# Supplementary material
Source: Springer Nature journal article supplement (https://www.springermedizin.de/resource/supplementary/12889_2012_5813_MOESM4_ESM.pdf/9496274)

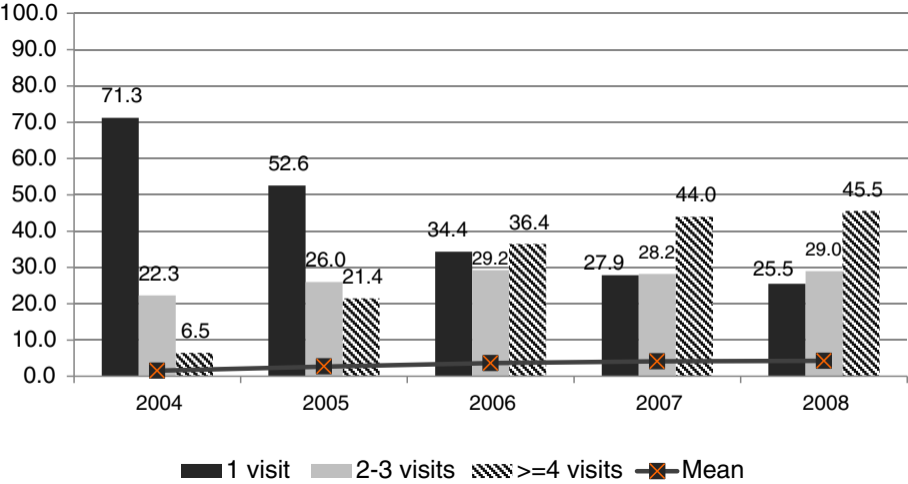

Supplement: MOESM4 [file 9496274]
